# Supplementary material for: Aortic Valve Calcium Associates with All-Cause Mortality Independent of Coronary Artery Calcium and Inflammation in Patients with End-Stage Renal Disease
Source: J Clin Med. 2020 Feb 24;9(2):607. doi: 10.3390/jcm9020607 (PMC7074421; doi:10.3390/jcm9020607)
Supplement: Supplementary file 1 [file jcm-09-00607-s001.pdf]

**Supplementary Table 1.** Baseline clinical and biochemical characteristics in 259 ESRD patients according to modality: non-dialyzed (CKD5-ND) patients, peritoneal dialysis (PD) and hemodialysis (HD).

|                                                       | CKD5-ND<br>(N=139, 54%) | HD<br>(N=35, 13%)   | PD<br>(N=85, 33%)   | p-value |
|-------------------------------------------------------|-------------------------|---------------------|---------------------|---------|
| <b><i>Demography and clinical characteristics</i></b> |                         |                     |                     |         |
| Age, years                                            | 55.0 (43.0-64.5)        | 46.0 (32.0-61.0)    | 56.6 (49.0-69.2)    | 0.002   |
| Male sex, n (%)                                       | 91 (65.5%)              | 27 (77.1%)          | 56 (65.9%)          | 0.40    |
| Diabetes, n (%)                                       | 25 (18.0%)              | 2 ( 5.7%)           | 20 (23.5%)          | 0.07    |
| CVD, n (%)                                            | 31 (22.3%)              | 6 (17.1%)           | 16 (18.8%)          | 0.72    |
| Smoker, n (%)                                         | 10 ( 7.2%)              | 2 ( 5.7%)           | 10 (11.8%)          | 0.40    |
| Systolic BP, mmHg                                     | 147.0 (135.0-160.0)     | 140.0 (125.0-160.0) | 135.0 (126.0-151.0) | <0.001  |
| Diastolic BP, mmHg                                    | 86.0 (79.0-93.0)        | 84.0 (75.0-93.0)    | 77.0 (72.0-88.0)    | <0.001  |
| FRS, %                                                | 14.4 (5.7-26.7)         | 5.8 (3.6-15.5)      | 17.8 (5.5-31.3)     | 0.002   |
| Vascular access, n (%)                                |                         |                     |                     |         |
| Central venous catheter                               | -                       | 18 (51%)            | -                   |         |
| Arteriovenous fistula                                 | -                       | 16 (46%)            | -                   |         |
| Arteriovenous graft                                   | -                       | 1 (3%)              | -                   |         |
| <b><i>Nutritional status</i></b>                      |                         |                     |                     |         |
| Malnutrition (SGA>1)                                  | 45 (32%)                | 8 (23%)             | 35 (41%)            | 0.13    |
| BMI, kg/m <sup>2</sup>                                | 25.2 (22.3-28.1)        | 23.9 (22.3-28.0)    | 24.7 (22.8-27.1)    | 0.62    |
| HGS, % of normal                                      | 86 (70, 105)            | 95 (76, 105)        | 78 (65, 98)         | 0.02    |
| <b><i>Biochemical markers</i></b>                     |                         |                     |                     |         |
| Hemoglobin, g/L                                       | 109.0 (103.0-116.0)     | 115.0 (110.0-127.0) | 117.0 (107.0-125.0) | <0.001  |
| Albumin, g/L                                          | 35.0 (31.0-38.0)        | 36.0 (33.0-39.0)    | 32.0 (30.0-35.0)    | <0.001  |
| HDL, mmol/L                                           | 1.2 (1.0-1.5)           | 1.3 (1.0-1.8)       | 1.3 (1.0-1.6)       | 0.42    |
| Triglyceride, mmol/L                                  | 1.5 (1.2-2.2)           | 1.1 (0.8-2.0)       | 1.5 (1.2-2.2)       | 0.03    |
| Total cholesterol, mmol/L                             | 4.4 (3.6-5.2)           | 4.0 (3.5-5.1)       | 4.8 (4.2-5.6)       | 0.02    |
| Hemoglobin, g/L                                       | 2.3 (2.1-2.4)           | 2.3 (2.1-2.4)       | 2.3 (2.2-2.4)       | 0.54    |
| Albumin, g/L                                          | 1.9 (1.6-2.2)           | 1.7 (1.2-1.8)       | 1.6 (1.3-1.8)       | <0.001  |
| HDL, mmol/L                                           | 273.5 (184.0-460.0)     | 296.0 (173.0-462.1) | 256.8 (160.3-412.0) | 0.62    |
| <b><i>Inflammatory markers</i></b>                    |                         |                     |                     |         |
| hsCRP, mg/L                                           | 1.4 (0.7-4.7)           | 1.2 (0.4-3.0)       | 1.7 (0.8-5.6)       | 0.09    |
| IL-6, pg/mL                                           | 3.2 (1.3-7.4)           | 1.4 (0.4-3.2)       | 4.5 (2.2-7.9)       | 0.001   |
| <b><i>AVC and CAC</i></b>                             |                         |                     |                     |         |

|                           |                  |                  |                  |        |
|---------------------------|------------------|------------------|------------------|--------|
| AVC score, AU             | 0 (0-24)         | 0 (0-2)          | 0 (0-137)        | 0.02   |
| CAC score, AU             | 82 (0-889)       | 8 (0-299)        | 370 (0-1730)     | 0.01   |
| <b><i>Others</i></b>      |                  |                  |                  |        |
| AGEs, AU                  | 3.1 (2.6-3.7)    | 3.1 (2.9-3.4)    | 3.3 (2.9-3.8)    | 0.19   |
| Aix, %                    | 23.0 (14.0-30.0) | 19.9 (14.2-27.3) | 23.0 (17.2-29.4) | 0.33   |
| <b><i>Medications</i></b> |                  |                  |                  |        |
| Ca-Blocker, n (%)         | 86 (62%)         | 13 (37%)         | 32 (38%)         | <0.001 |
| Beta-Blocker, n (%)       | 91 (66%)         | 22 (63%)         | 56 (66%)         | 0.95   |
| ACEi/ARB, n (%)           | 106 (76%)        | 16 (46%)         | 45 (53%)         | <0.001 |
| Statin, n (%)             | 50 (36%)         | 9 (26%)          | 36 (42%)         | 0.22   |

Data are presented as median (IQR, interquartile range) for continuous measures, and n (%) for categorical measures;

Abbreviations: CVD, cardiovascular disease; BP, blood pressure; FRS, Framingham CVD risk score; SGA, subjective global assessment; BMI, body mass index; %HGS, hand grip strength, converted to % of sex-matched healthy controls; HDL, high-density lipoprotein; LDL, low-density lipoprotein; iPTH, intact parathyroid hormone; hsCRP, high sensitivity C-reactive protein; IL-6, interleukin-6; AU, Agatston units; AVC, aortic valve calcium; CAC, coronary artery calcium; AU, Agatston units; AGEs, advanced glycation end products; Aix(%), augmentation index; ACEi/ARB, angiotensin-converting enzyme inhibitor/ angiotensin II receptor blockers

**Supplementary Table 2.** Baseline clinical and biochemical characteristics in 259 ESRD patients according to the presence of AVC and CAC

|                                                       | AVC (-) CAC (-)  | AVC (+) CAC (-)  | AVC (-) CAC (+)  | AVC (+) CAC (+)  | p-value |
|-------------------------------------------------------|------------------|------------------|------------------|------------------|---------|
|                                                       | N=72, 28%        | N=5, 2%          | N=87, 33%        | N=95, 37%        |         |
| <b><i>Demography and clinical characteristics</i></b> |                  |                  |                  |                  |         |
| Age, years                                            | 32 (26-46)       | 41 (33-49)       | 55 (47-61)       | 65 (56-72)       | <0.001  |
| Male sex, n (%)                                       | 44 (61)          | 3 (60)           | 57 (66)          | 70 (74)          | 0.35    |
| Diabetes, n (%)                                       | 3 (4)            | 0 (0)            | 14 (16)          | 30 (32)          | <0.001  |
| CVD, n (%)                                            | 4 (6)            | 1 (20)           | 19 (22)          | 29 (31)          | 0.001   |
| Smoker, n (%)                                         | 2 (3)            | 0 (0)            | 7 (8)            | 13 (14)          | 0.08    |
| Systolic BP, mmHg                                     | 137 (127-151)    | 147 (147-152)    | 144 (131-157)    | 144 (132-164)    | 0.10    |
| Diastolic BP, mmHg                                    | 85 (76-95)       | 88 (86-93)       | 85 (75-92)       | 80 (74-90)       | 0.21    |
| FRS, %                                                | 3.3 (1.3-6.8)    | 3.4 (1.5-12.4)   | 14.2 (7.7-24.6)  | 27.8 (15.9-41.4) | <0.001  |
| <b><i>Nutritional status</i></b>                      |                  |                  |                  |                  |         |
| Malnutrition (SGA>1)                                  | 28 (39%)         | 1 (20%)          | 25 (29%)         | 34 (36%)         | 0.49    |
| BMI, kg/m <sup>2</sup>                                | 23.8 (21.5-26.1) | 22.2 (19.7-23.5) | 24.8 (22.9-27.3) | 25.4 (23.5-29.1) | 0.002   |
| HGS, % of normal                                      | 100 (78-109)     | 73 (63-82)       | 89 (71-105)      | 74 (59-86)       | <0.001  |
| <b><i>Biochemical markers</i></b>                     |                  |                  |                  |                  |         |
| Hemoglobin, g/L                                       | 110 (101-121)    | 117 (101-121)    | 114 (109-121)    | 113 (104-121)    | 0.17    |
| Albumin, g/L                                          | 35 (32-38)       | 28 (26-36)       | 35 (32-38)       | 32 (28-35)       | <0.001  |
| HDL, mmol/L                                           | 1.3 (1.1-1.6)    | 1.7 (1.7-1.9)    | 1.3 (1.0-1.6)    | 1.2 (1.0-1.5)    | 0.016   |
| Triglyceride, mmol/L                                  | 1.3 (1.1-2.2)    | 1.6 (1.6-1.9)    | 1.5 (1.0-2.0)    | 1.6 (1.2-2.2)    | 0.11    |

|                                    |                  |                 |                  |                  |        |
|------------------------------------|------------------|-----------------|------------------|------------------|--------|
| Total cholesterol, mmol/L          | 4.6 (3.8-5.2)    | 4.8 (3.7-5.0)   | 4.7 (3.9-5.4)    | 4.5 (3.6-5.2)    | 0.86   |
| Calcium, mmol/L                    | 2.3 (2.2-2.4)    | 2.5 (2.3-2.5)   | 2.3 (2.2-2.4)    | 2.3 (2.1-2.4)    | 0.42   |
| Phosphate, mmol/L                  | 1.6 (1.4-2.0)    | 2.0 (1.8-2.5)   | 1.7 (1.5-2.1)    | 1.8 (1.4-2.1)    | 0.19   |
| iPTH, ng/L                         | 231 (160-429)    | 465 (373-522)   | 274 (179-430)    | 281 (179-448)    | 0.42   |
| <b><i>Inflammatory markers</i></b> |                  |                 |                  |                  |        |
| hsCRP, mg/L                        | 0.8 (0.3-2.2)    | 6.5 (1.8-13.9)  | 1.5 (0.7-3.7)    | 2.8 (1.0-7.6)    | <0.001 |
| IL-6, pg/mL                        | 1.9 (0.5-3.1)    | 2.3 (1.4-4.5)   | 2.1 (0.9-6.3)    | 5.8 (3.3-9.1)    | <0.001 |
| <b><i>AVC and CAC</i></b>          |                  |                 |                  |                  |        |
| AVC score, AU                      | 0                | 19 (18-22)      | 0                | 103 (23-244)     | <0.001 |
| CAC score, AU                      | 0                | 0               | 134 (14-752)     | 907 (370-2156)   | <0.001 |
| <b><i>Others</i></b>               |                  |                 |                  |                  |        |
| AGEs, AU                           | 2.8 (2.4-3.3)    | 3.4 (3.0-3.5)   | 3.2 (2.9-3.8)    | 3.5 (2.9-3.9)    | <0.001 |
| Aix, %                             | 19.5 (10.9-28.4) | 22.0 (1.0-28.5) | 22.0 (16.3-28.0) | 26.6 (20.3-32.0) | 0.004  |
| <b><i>Medications</i></b>          |                  |                 |                  |                  |        |
| Ca-Blocker, n (%)                  | 36 (50)          | 3 (60)          | 40 (46)          | 52 (55)          | 0.66   |
| Beta-Blocker, n (%)                | 33 (46)          | 3 (60)          | 57 (66)          | 76 (80)          | <0.001 |
| ACEi/ARB, n (%)                    | 46 (64)          | 4 (80)          | 59 (68)          | 58 (61)          | 0.69   |
| Statin, n (%)                      | 15 (21)          | 2 (40)          | 31 (36)          | 47 (49)          | 0.002  |

Data are presented as median (IQR, interquartile range) for continuous measures, and n (%) for categorical measures;

Abbreviations: AVC, aortic valve calcium; CAC, coronary artery calcium; CVD, cardiovascular disease; BP, blood pressure; FRS, Framingham CVD risk score; SGA, subjective global assessment; BMI, body mass index; %HGS, hand grip strength, converted to % of sex-matched healthy controls; HDL, high-density lipoprotein; LDL, low-density lipoprotein; iPTH, intact parathyroid hormone; hsCRP, high sensitivity C-reactive protein; IL-6, interleukin-6; AU, Agatston units; AGEs, advanced glycation end products; Aix(%), augmentation index; ACEi/ARB, angiotensin-converting enzyme inhibitor/ angiotensin II receptor blockers

**Supplementary Table 3.** Univariate correlations between aortic valve calcium score and other variables (only significant correlations are listed).

| Variables    | AVC>0 |         |
|--------------|-------|---------|
|              | Rho   | p value |
| Age          | 0.52  | <.0001  |
| Diabetes     | 0.24  | <.0001  |
| CVD          | 0.19  | 0.003   |
| Smoker       | 0.13  | 0.04    |
| FRS          | 0.52  | <.0001  |
| Beta Blocker | 0.23  | 0.0002  |
| Statin use   | 0.20  | 0.001   |
| %HGS         | -0.34 | <.0001  |
| Albumin      | -0.28 | <.0001  |
| Triglyceride | 0.15  | 0.02    |
| hsCRP        | 0.29  | <.0001  |
| IL-6         | 0.43  | <.0001  |
| AGEs         | 0.25  | 0.0004  |
| Aortic AIx   | 0.23  | 0.0007  |
| CAC score    | 0.59  | <.0001  |

Abbreviations: AVC, aortic valve calcium; CVD, cardiovascular disease; FRS, Framingham CVD risk score; PEW, protein-energy wasting; %HGS, hand grip strength, converted to % of sex-matched healthy controls; hsCRP, high sensitivity C-reactive protein; IL-6, interleukin-6; AGEs, advanced glycation end products; AIx(%), augmentation index; CAC, coronary artery calcium

**Supplementary Table 4.** Multivariate logistic regression of factors associated with presence of aortic calcium score (pseudo-R =0.29)

| <b>Aortic&gt;0</b>                | <b>OR (95% CI)</b> | <b>p-value</b> |
|-----------------------------------|--------------------|----------------|
| per 1-SD increase of FRS          | 2.25 (1.43, 3.35)  | <0.0001        |
| per 1-SD increase of %HGS         | 0.82 (0.55, 1.21)  | 0.31           |
| per 1-SD increase of Albumin      | 0.72 (0.51, 1.04)  | 0.08           |
| per 1-SD increase of Triglyceride | 0.96 (0.69, 1.33)  | 0.81           |
| per 1-SD increase of hsCRP        | 1.10 (0.80, 1.50)  | 0.56           |
| per 1-SD increase of Aix%         | 0.85 (0.57, 1.26)  | 0.42           |
| per 1-SD increase of AGEs         | 1.14 (0.78, 1.67)  | 0.50           |
| per 1-SD increase of CAC          | 2.18 (1.34, 3.59)  | 0.002          |
| Presence of CVD                   | 0.89 (0.39, 2.03)  | 0.78           |
| Statin use                        | 1.54 (0.80, 2.99)  | 0.20           |

Abbreviations: AVC, aortic valve calcium; CVD, cardiovascular disease; FRS, Framingham CVD risk score; %HGS, hand grip strength, converted to % of sex-matched healthy controls; hsCRP, high sensitivity C-reactive protein; CAC, coronary artery calcium; Aix (%), augmentation index; AGEs, advanced glycation end products; CVD, cardiovascular disease

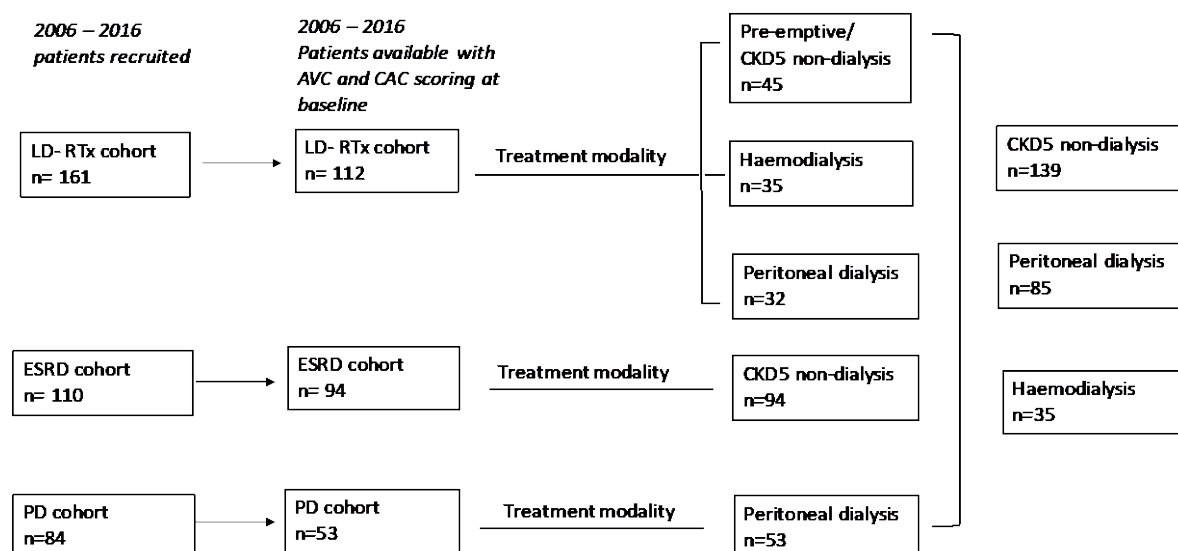

**Supplementary Figure 1.** Flow chart of patient's recruitment in the cohort study. LD-RTx, living donor kidney transplant

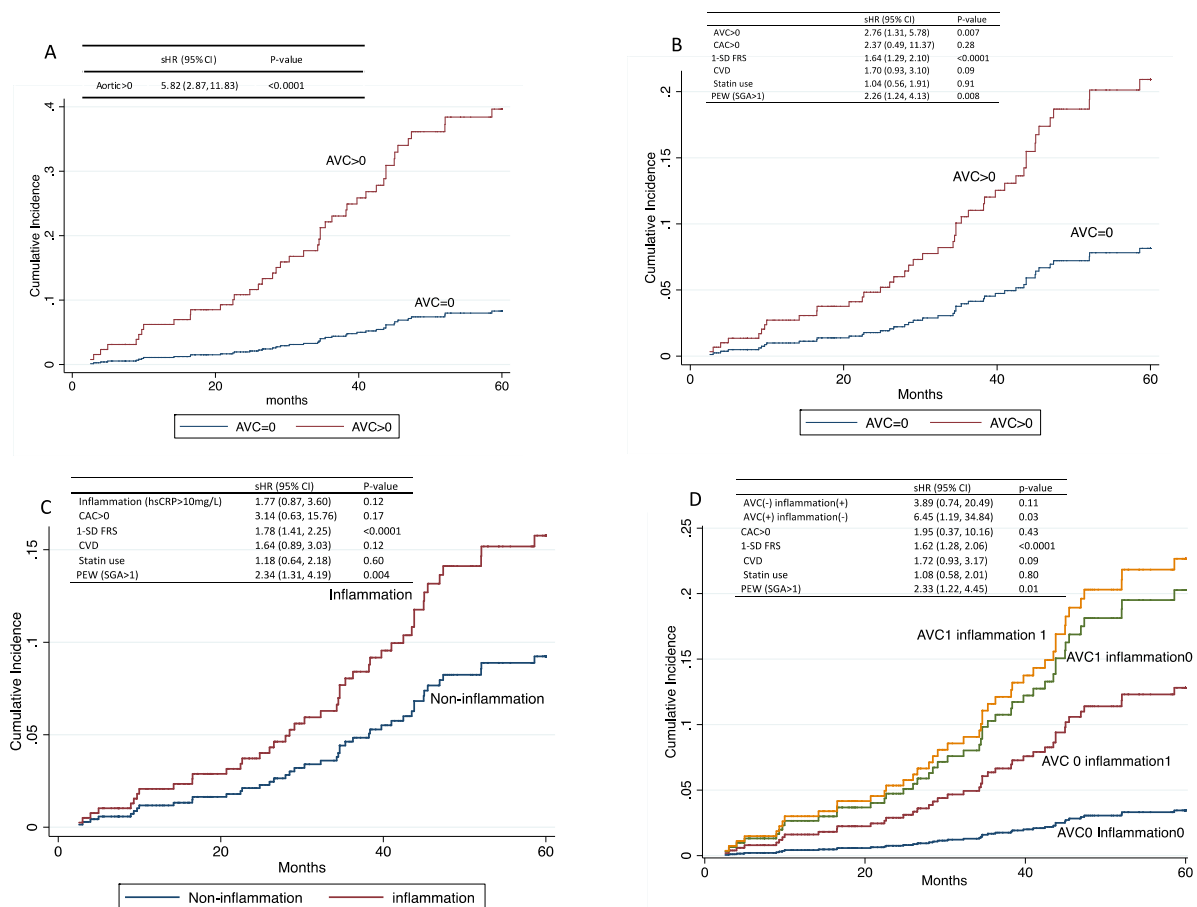

**Supplementary Figure 2.** Association of aortic valve calcium (AVC) and coronary artery calcium (CAC) with all-cause mortality in separate and combined models. **2A:** AVC and all-cause mortality in crude model **2B:** AVC and all-cause mortality in adjusted model; **2C:** CAC and all-cause mortality in adjusted model; **2D:** Stratification of presence of AVC and CAC with all-cause mortality (AVC (+) CAC (+) group was combined with AVC (+) CAC (-) group due to small size (n=5))

Inserted are multivariate competing risk models for AVC (**B**) CAC (**C**), and stratification AVC and CAC (**D**); all models were adjusted with 1-SD FRS, CVD, inflammation, use of statins and nutritional status (SGA>1).

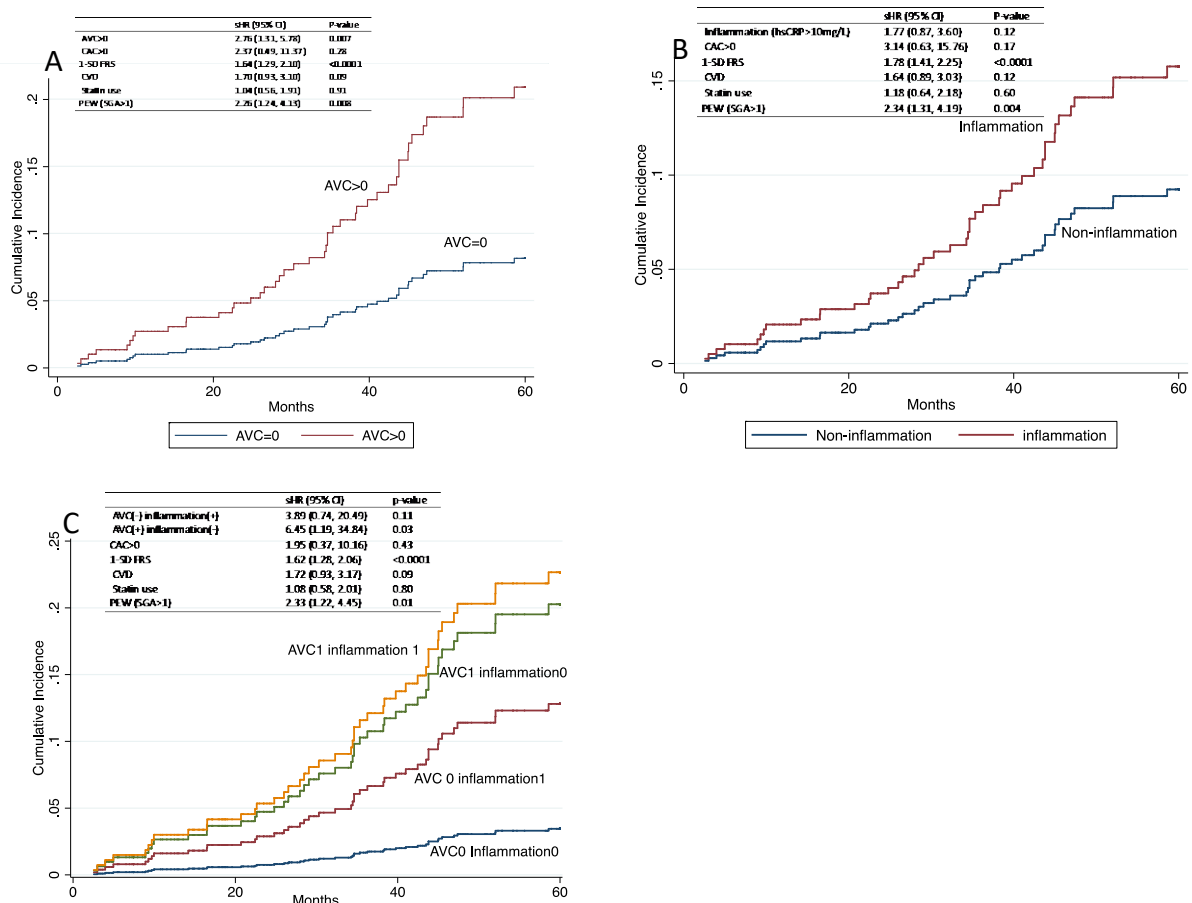

**Supplementary Figure 3.** Association of aortic valve calcium (AVC) and inflammation with all-cause mortality in separate and combined models. 3A: Presence of AVC and all-cause mortality; 3B: Presence of inflammation and all-cause mortality; 3C: Stratification of presence of AVC and inflammation with all-cause mortality

Inserted are multivariate competing risk models for AVC (A), inflammation (B), and stratification of AVC and inflammation (C); all models were adjusted with 1-SD FRS, CVD, CAC, use of statins and nutritional status (SGA>1).

## **Supplementary Text 1.**

### **Histological assessment of arterial media calcification**

In a subgroup of 102 ESRD patients undergoing LD-Rtx, vascular biopsies were obtained from the inferior epigastric artery<sup>14</sup>. Within 20 minutes after skin incision at the start of surgery, one piece (1-2 cm in length) of the artery was collected by sharp dissection. Samples were immediately placed in All Protect Tissue Reagent (Qiagen, Hilden, Germany), snap-frozen in isopentane and subsequently stored at -70°C, or fixed in 4% phosphate buffered formalin. Formalin-fixed material from the epigastric arteries were embedded in paraffin. 1-2 µm thick sections were stained with hematoxylin and eosin and von Kossa staining, respectively. An experienced pathologist (MS) evaluated the sections. The degree of medial calcification was semi-quantified as no (score 0; n=17), mild (score 1; n=48), moderate (score 2; n=24) or extensive (score 3; n=13) signs of media vascular calcification.

### **Biochemical assessments**

Analyses of plasma hsCRP (coefficient of variation, CV, 5%), calcium, phosphate, intact parathyroid hormone, cholesterol, triglycerides, HDL, cholesterol, creatinine, albumin (CV 3-4%) and hemoglobin were performed at the Clinical Chemical Laboratory of Karolinska University Hospital, Stockholm, Sweden. Plasma interleukin-6, IL-6 (CV 4%) was analyzed by immunometric assays on an Immulite 1000 Analyzer (Siemens Healthcare Diagnostics, Los Angeles, CA, USA) using commercial kits.

### **Augmentation index (AIx %) measurement**

Assessment of arterial stiffness was performed non-invasively by SphygmoCorVR System (AtCor Medical, Sydney, Australia), using tonometry-based and cuff-based SphygmoCorDevices. The peripheral pulse waveform (PPW) was recorded from the radial artery at the wrist in non-fistula arm using applanation tonometry with a sensor probe. PPW and brachial blood pressure measurements were used to estimate central aortic pressure

waveform calculated by the transfer function. Using the cuff-based SphygmoCor Device, brachial artery compression waveforms were obtained by partially inflating a cuff over the brachial artery between the shoulder and the elbow joint. The brachial waveforms were calibrated using cuff-measured brachial systolic and diastolic blood pressures, and then used to generate central aortic pressure waveforms by transfer function. Augmentation pressure (AP) and AIx was derived from this with the technique of pulse wave analysis. The merging of incident and the reflected wave (the inflection point) were identified on the generated central aortic pressure waveform. AP was defined as the maximum systolic pressure minus pressure at the inflection point. AIx was defined as AP divided by pulse pressure and expressed as a percentage. In addition, because AIx is influenced by heart rate, an index normalized for heart rate of 75 beats per minute (bpm) was used. SphygmoCor adjusts the AIx at an inverse rate of 4.8% for each 10 bpm increment.

### **SAF measurement**

Advanced glycation end-products (AGEs) autofluorescence was measured using an Autofluorescence AGE reader (DiagnOptics Technologies BV, Groningen, The Netherlands). Patients with tattooed and dark skin were not investigated. The AGE reader illuminates a skin surface of  $\sim 1 \text{ cm}^2$ , guarded against surrounding light, with an excitation light source between 300 and 420 nm. Emission light (fluorescence in the wavelength range between 420 and 600nm) and reflected excitation light (with a wave length between 300 and 420nm) from the skin are measured with a spectrometer. SAF was calculated as the ratio between the emission light and reflected excitation light, multiplied by 100, and expressed in arbitrary units (AU). All measurements were performed at room temperature in a semi-dark environment.
